# Supplementary material
Source: publisher site journal article supplement (https://www.dovepress.com/get_supplementary_file.php?f=454881.docx)
Supplement: Supplementary file 1 [file get_supplementary_file.php]

**Supplementary Material**

**Table S1.** Comparisons of the means of parents’ self-scale variables between MNF and Sham groups in baseline

| M(SD) | MNF (N=31) | Sham (N=30) | P-value |
| --- | --- | --- | --- |
| BDI-II | 9.48(6.54) | 9.93(9.00) | 0.824 |
| BAI | 4.52(5.89) | 3.97(4.58) | 0.686 |
| BIS | 24.55(8.04) | 20.27(7.62) | 0.037* |
| K-ARS | 7.68(6.00) | 4.13(3.68) | 0.007** |
| DBDS | 2.16(3.59) | 1.57(2.06) | 0.433 |
| ETI | 1.65(2.24) | 2.33(3.29) | 0.343 |
| YGTSS | 0.06(0.36) | 0.20(0.93) | 0.359 |
| WURS | 40.26(15.286) | 39.80(16.85) | 0.912 |

Notes: *p<0.05, **p<0.01.

**Abbreviations:** MNF, Mobile neurofeedback; M, mean; SD, standard deviation; BDI-II, Beck Depression Inventory-II; BAI, Beck Anxiety Inventory; BIS, Barratt Impulsiveness Scale; K-ARS, Korean ADHD Rating Scale; DBDS, Disruptive Behavioral Disorder Scale; ETI, Early Trauma Inventory; YGTSS, Yale Global Tic Severity Scale; WURS, Wender Utah Rating Scale.

**Table S2.** Comparisons of the means of children’s self-scale variables between MNF and Sham groups in baseline

| M(SD) | MNF (N=31) | Sham (N=30) | P-value |
| --- | --- | --- | --- |
| CDI | 7.77(5.64) | 6.80(4.75) | 0.469 |
| BIS | 28.23(9.87) | 28.47(8.24) | 0.661 |
| STAI-T | 29.58(7.66) | 26.27(7.22) | 0.087 |
| STAI-S | 30.94(6.18) | 30.07(6.55) | 0.502 |
| SCARED | 14.77(10.10) | 10.27(6.74) | 0.045* |
| K-scale | 56.13(15.34) | 53.17(12.04) | 0.406 |

Notes: *p<0.05.

**Abbreviations:** MNF, Mobile neurofeedback; M, mean; SD, standard deviation; CDI, Children’s Depression Inventory; BIS, Barratt Impulsiveness Scale; STAI, The State-Trait Anxiety Inventory; SCARED, The Screen for Child Anxiety Related Emotional Disorders; K-scale, the Korea Internet addiction scale.
